# Supplementary material for: A highly sensitive fluorescent sensor for ammonia detection based on aggregation-induced emission luminogen-doped liquid crystals
Source: Royal Society of Chemistry journal article supplement (doi:10.1039/d2sm00568a), 2022-01-01
Supplement: d2sm00568a1.pdf [file d2sm00568a1.pdf]

## Supplementary Information

# Highly Sensitive Fluorescence Sensor for Ammonia Detection Based on Aggregation-Induced Emission Luminogen Doped Liquid Crystals

Xiyun Zhan,<sup>ab</sup> Yanjun Liu,<sup>a</sup> Fei Wang,<sup>a</sup> Dongyu Zhao,<sup>\*c</sup> Kun-Lin Yang<sup>\*b</sup> and Dan Luo<sup>\*a</sup>

<sup>a</sup> *Department of Electrical and Electronic Engineering, Southern University of Science and Technology, Xueyuan Road 1088, Shenzhen, Guangdong 518055, China. E-mail: luod@sustech.edu.cn*

<sup>b</sup> *Department of Chemical and Biomolecular Engineering, National University of Singapore, 4 Engineering Drive 4, Singapore 117576, Singapore. E-mail: cheyk@nus.edu.sg*

<sup>c</sup> *School of Chemistry and Environment, Beihang University, Xueyuan Road 37, Beijing 100191, China. E-mail: zhaodongyu@buaa.edu.cn*

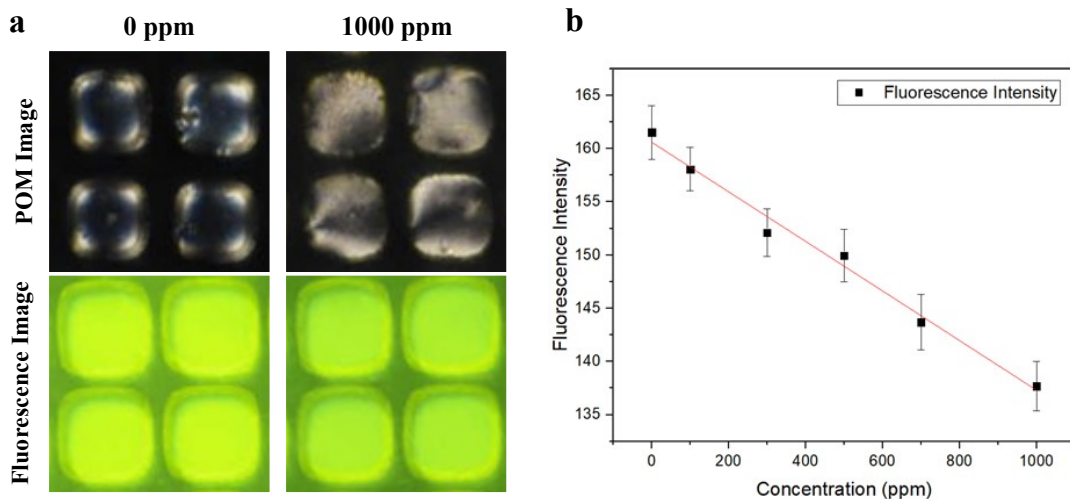

Fig. S1 (a) POM images and fluorescence images of the free-standing AIEgen-doped LC film at  $10\ \mu\text{m}$  in contact with air upon exposure to 0 ppm and 1000 ppm ammonia vapor. (b) Response of the average fluorescence intensity to different ammonia concentrations from 0 to 1000 ppm.

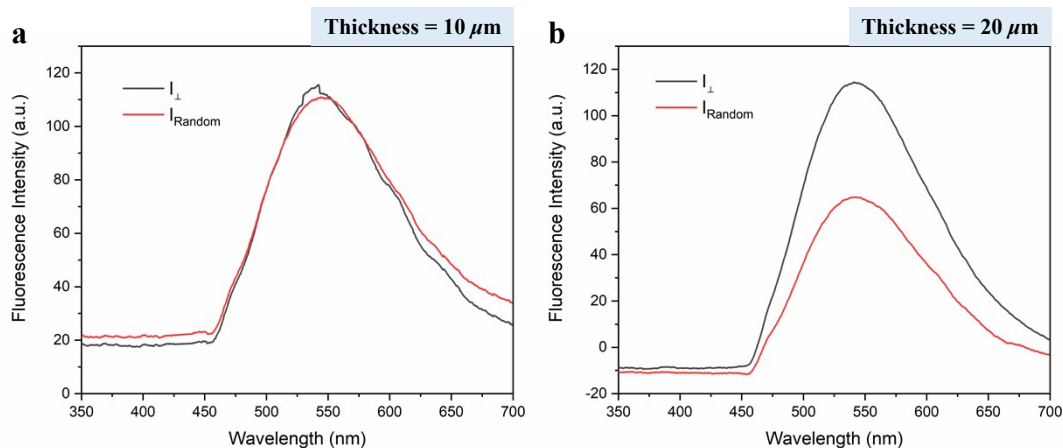

Fig. S2 Fluorescence spectra of the (a)  $10\ \mu\text{m}$  and (b)  $20\ \mu\text{m}$  LC cells consist of 0.1 wt% AIEgen-doped LC at the homeotropic and random alignment state. Excitation wavelength: 365 nm.

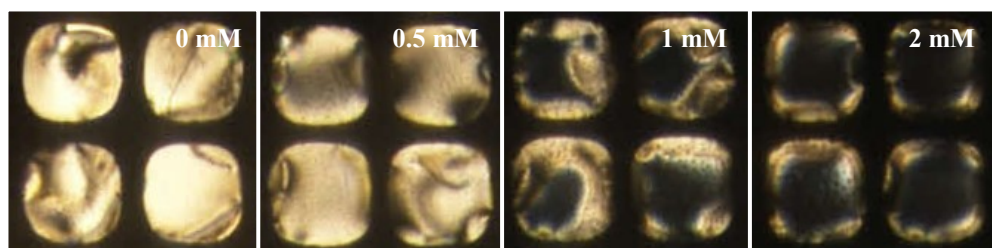

Fig. S3 Optical images of the AIEgen-doped LC system in different concentration of SDS solution.

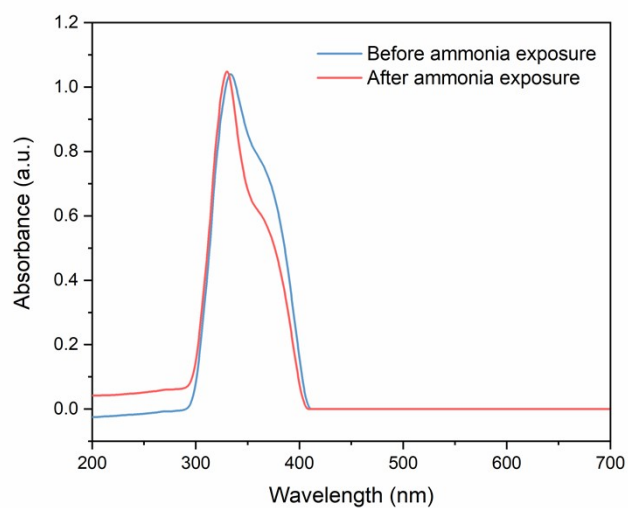

Fig. S4 Absorbance spectrum of the AIEgen-doped LC based sensor before and after ammonia exposure.

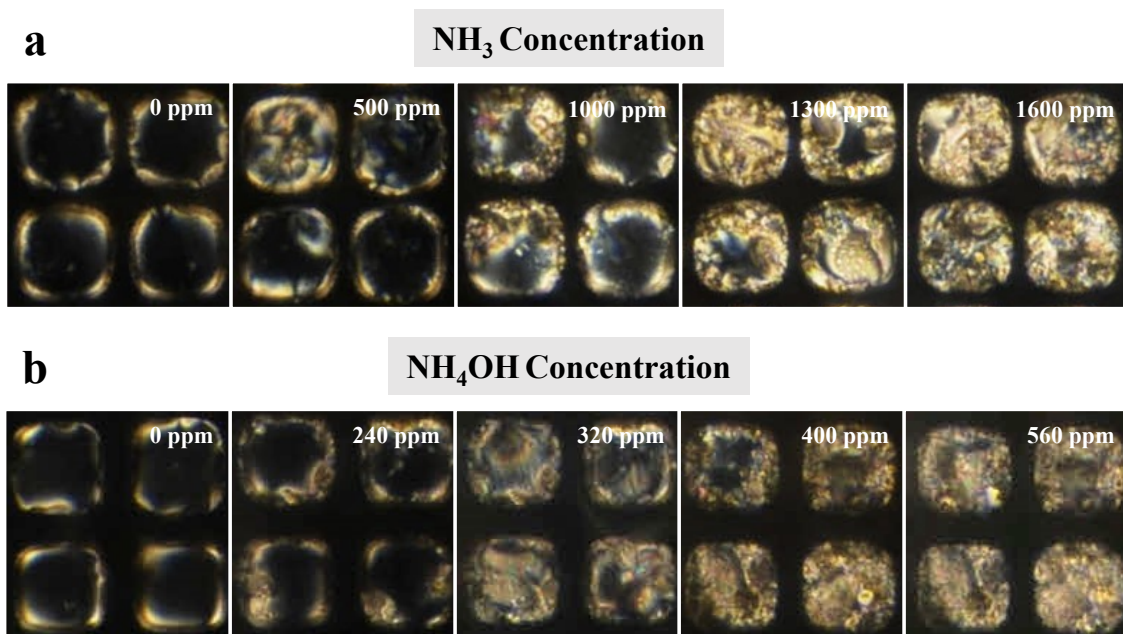

Fig. S5 Optical images of the AIEgen-doped LC based sensor in the presence of different concentrations of (a) ammonia vapor and (b) aqueous ammonia.
